# Supplementary material for: Synthesis and properties of ω-pentadecalactone-co-δ-hexalactone copolymers: a biodegradable thermoplastic elastomer as an alternative to poly(ε-caprolactone)
Source: Royal Society of Chemistry journal article supplement (doi:10.1039/c5ra23404b), 2015-12-22
Supplement: c5ra23404b1.pdf [file c5ra23404b1.pdf]

### Supplementary information

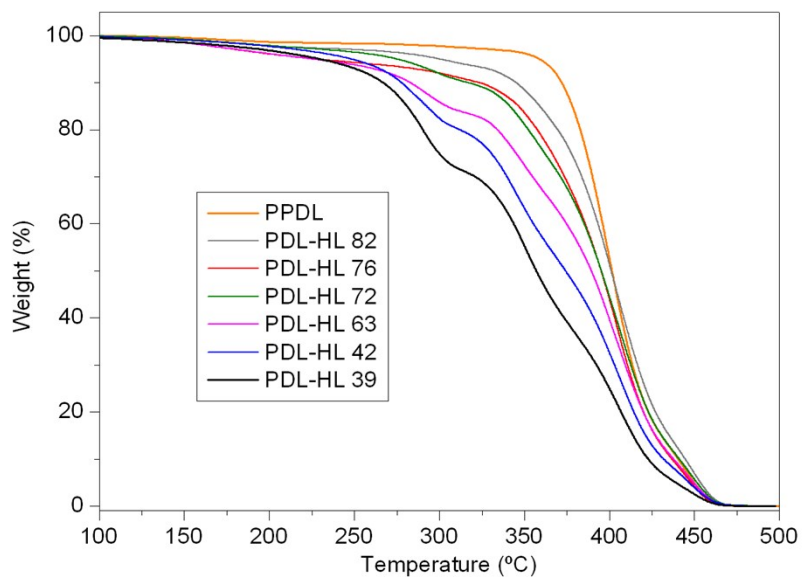

Figure 1. Thermogravimetric (TG) curves of PPDL and the  $\omega$ -PDL-co- $\delta$ -HL copolymers.

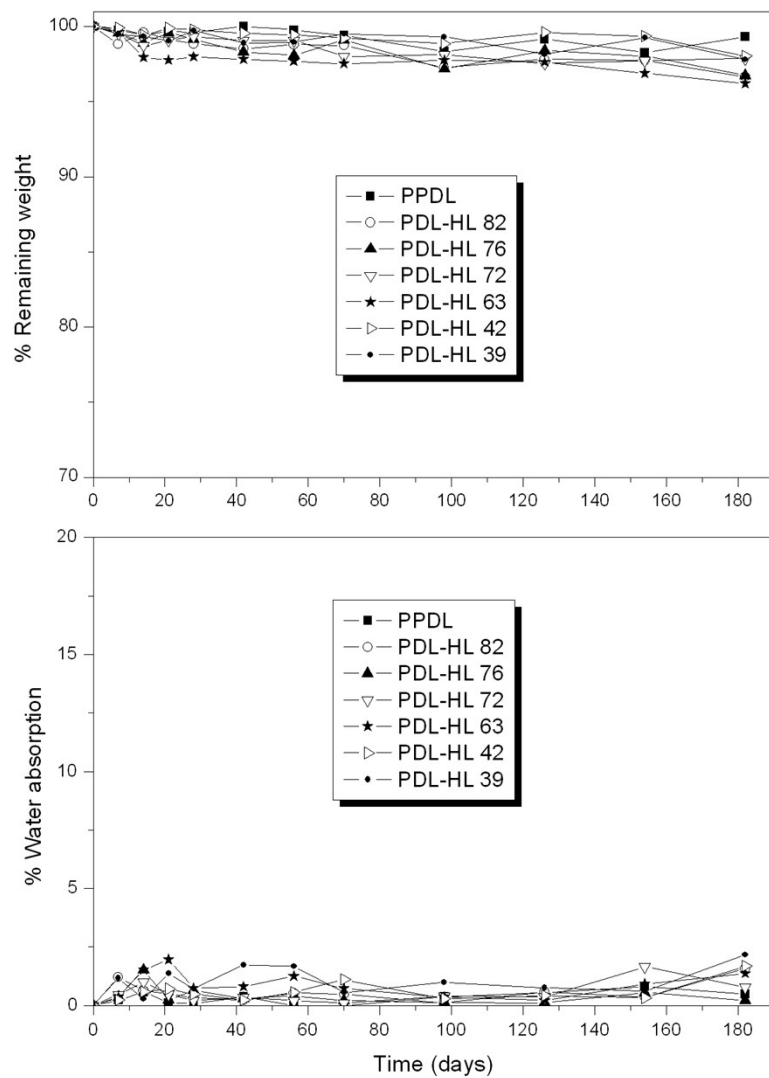

Figure 2. Evolution of the remaining weight and the water absorption of the poly( $\omega$ -pentadecalactone-co- $\delta$ -hexalactone)
